# Supplementary material for: Synthesizing crystalline g-C3N4 for enhanced photocatalytic hydrogen evolution under visible light
Source: Royal Society of Chemistry journal article supplement (doi:10.1039/d3ce01039b), 2024-01-01
Supplement: d3ce01039b1.pdf [file d3ce01039b1.pdf]

## Supporting information

### **Synthesizing crystalline g-C<sub>3</sub>N<sub>4</sub> for enhanced photocatalytic hydrogen evolution under visible light**

Linyu Zhu<sup>a</sup>, Wenchi Zhang<sup>a</sup>, Guang Shi<sup>a</sup>, Xu Tian<sup>a</sup>, Peisong Tang<sup>a</sup>, Pengfei Xia<sup>b,c\*</sup>

<sup>a</sup>*Department of Materials and Chemistry, Huzhou University, Huzhou 313000, China.*

<sup>b</sup>*Yangtze Delta Region Institute (Huzhou), University of Electronic Science and Technology of China, Huzhou, 313001, P.R.China.*

<sup>c</sup>*School of Electronic Science and Engineering, University of Electronic Science and Technology of China, Chengdu 610054, P.R.China*

*\*corresponding author: [forsky@csj.uestc.edu.cn](mailto:forsky@csj.uestc.edu.cn)*

## **Experimental Section**

### **Synthesis of g-C<sub>3</sub>N<sub>4</sub> (UCN) photocatalyst**

UCN sample was prepared from urea precursor: 20 g urea were put into an alumina crucible and then the crucible was transferred into muffle furnace. Afterwards, the crucible was heated to 550°C by controlling the heating rate of 5 °C/min and maintained at this temperature for 3 hours. After natural cooling, light yellow powder was obtained. The obtained powder was placed in an open crucible and then again put in the muffle furnace. Subsequently, the crucible was continuously heated up to 600°C at 5°C / min and maintained for 2 hours. Finally, after cooling down, UCN sample was obtained.

### **Synthesis of hexagonal prism g-C<sub>3</sub>N<sub>4</sub> (HPCN) photocatalyst**

Firstly, 30 mg UCN was dissolved into 35 ml of deionized water and then fully stirred for 30 min. The evenly mixed suspension was transferred to the reaction kettle. The hydrothermal reaction was performed at 180 °C for 6 h in an oven. After cooling down, the product was carefully collected and adequately washed with deionized water and ethanol. Eventually, the white powder was obtained after dried by vacuum at 60°C for 24 h. The sample was labelled as HPCN.

### **Characterizations.**

The crystalline phase of the samples was determined using the powder x-ray diffractometer (Rigaku D/Max-2000 diffractometer). The field-emission scanning electron images (FSEM) of the samples were collected by field emission scanning electron microscope (JSM-7500, Japan). The transmission electron microscope images (TEM) of the samples were obtained via the Field-emission transmission electron microscopy (JEM-2100F). A UV-visible diffuse reflection spectrometer (UV-3700, Japan) was used to analyze light absorption of all the samples. The Fourier transform infrared (FTIR, IRAffinity-1, Shimadzu) spectroscopy and X-ray photoelectron spectroscopy (XPS, ESCALAB 250Xi, ThermoScientific) were

collected to research the chemical transformation of the samples. The transient / steady-state fluorescence spectrometer (FLS1000, Edinburgh) was conducted to test the steady-state fluorescence spectrum (PL) and time-resolved fluorescence spectrum (TRPL), respectively. The electronic paramagnetic resonance spectra (EPR) were tested at room temperature (EMXnano, Bruker).

### **Photocatalytic hydrogen evaluation**

A 300W LED lamp ( $380\text{nm} < \lambda < 780\text{nm}$ ) was conducted as the visible light source in the photocatalytic test. 10 mg samples were dispersed in a reactor containing 18 ml of water under ultrasound dispersion. After that, 2 ml triethanolamine was added to the above suspension, and then adding 1% Pt as the cocatalyst. Afterwards, high purity air was pumped into the reactor for 30 min to removal the air, and then was placed under visible light. Finally, the amount of  $\text{H}_2$  was detected by the gas chromatograph (GC-14C, Shimadzu, Japan).

### **Electrochemical performance test**

Photoelectrochemical characterizations were conducted on a CHI 760E electrochemical workstation with a three-electrode experimental system. 0.5 M  $\text{Na}_2\text{SO}_4$  solution acted as electrolyte. The prepared photocatalyst was mixed with adequate ethanol and nafion solution to form uniform emulsion. Afterwards, the emulsion was deposited quickly on the FTO to form working electrodes. The 300 W xenon lamp serves as the light source to test the Electrochemical impedance spectrum (EIS) and transient photocurrent response curves.

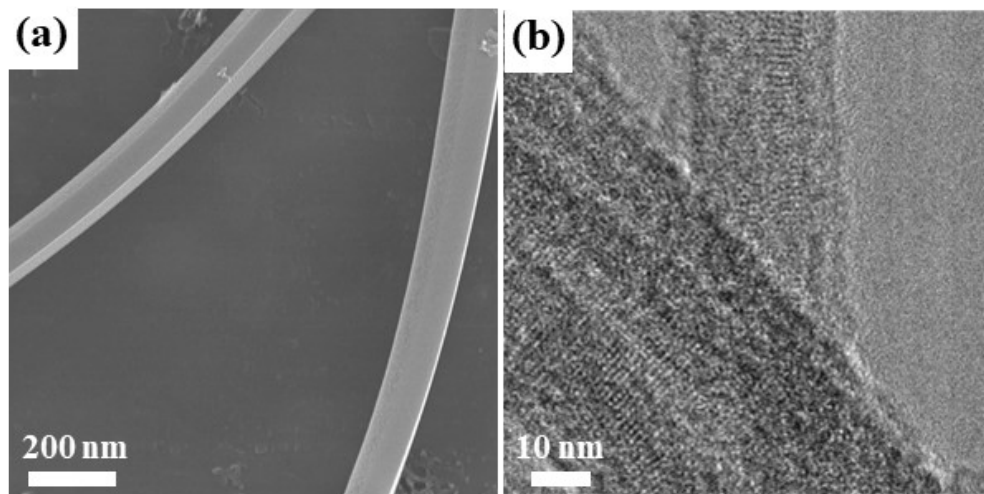

Figure S1. (a) SEM and (b) HRTEM images of HPCN

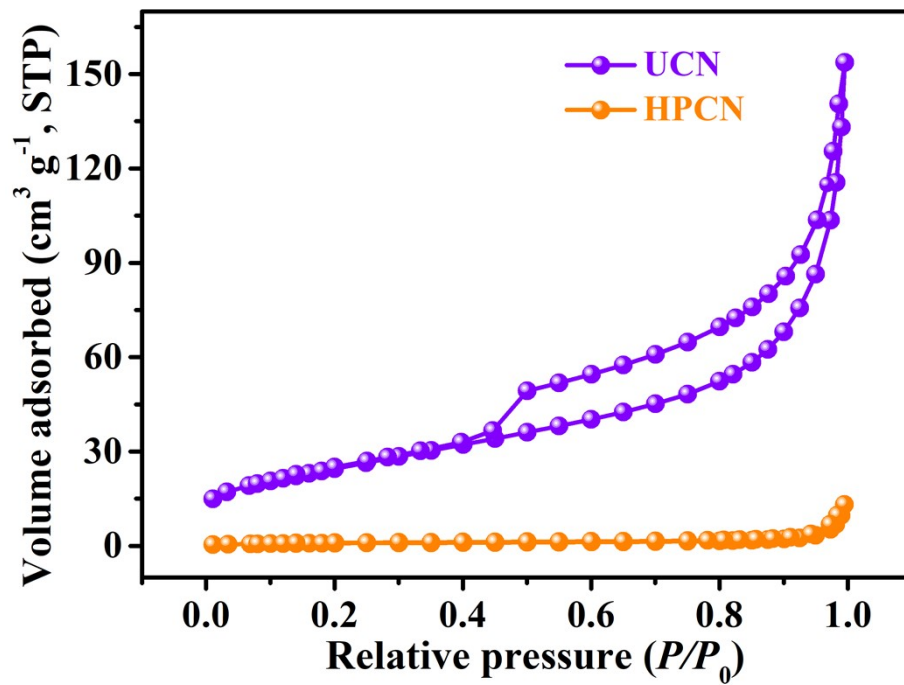

Figure S2.  $\text{N}_2$  adsorption–desorption isotherms of UCN and HPCN

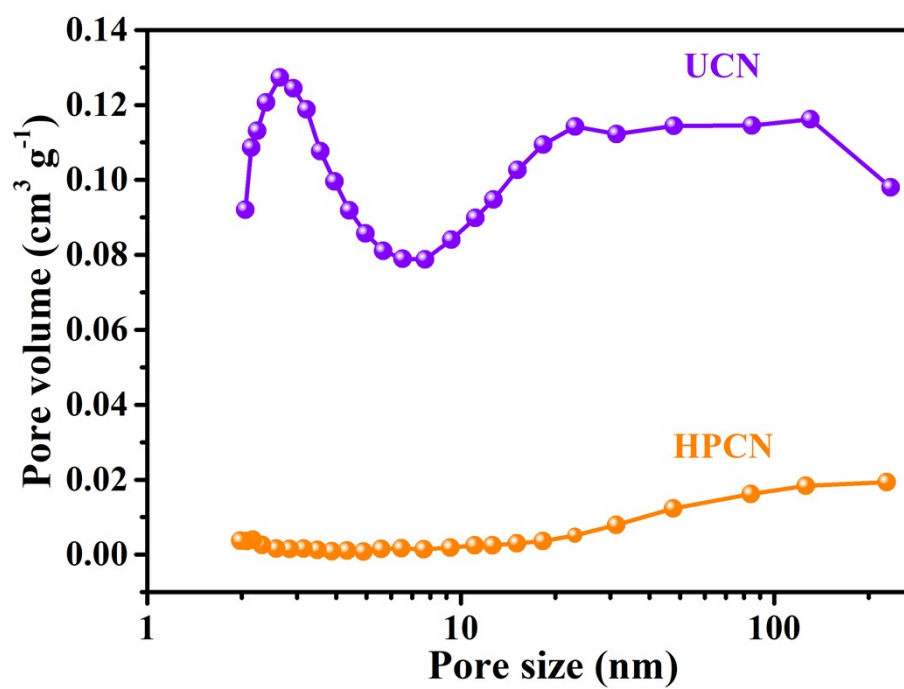

Figure S3. The pore size distribution (PSD) of UCN and HPCN

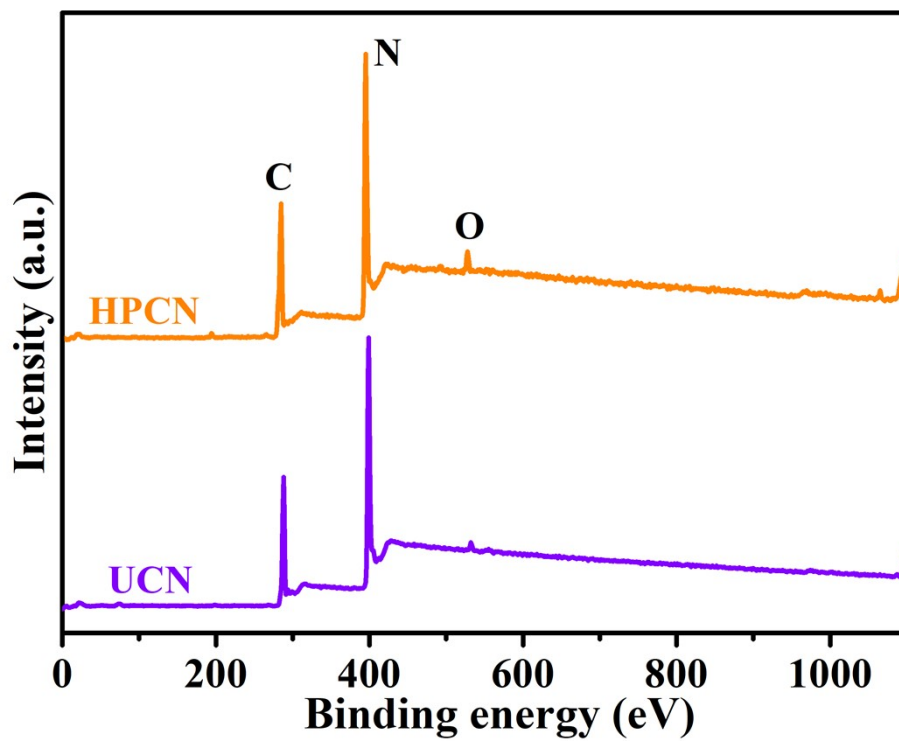

Figure S4. The survey XPS spectra of UCN and HPCN

**Table S1: The summarized parameters obtained from N<sub>2</sub> adsorption-desorption isotherms.**

| Sample | $V_{\text{pore}}$ | $D_{\text{pore}}$ | $S_{\text{BET}}$ |
|--------|-------------------|-------------------|------------------|
| UCN    | 0.16              | 7.2               | 98               |
| HPCN   | 0.008             | 32.4              | 11               |

$V_{\text{pore}}$  represents total pore volume (cm<sup>3</sup>/g),  $D_{\text{pore}}$  represents average pore width (nm),

$S_{\text{BET}}$  is the specific surface area (m<sup>2</sup>/g)



**Table S2: The fitted parameters obtained from decay curves of samples.**

| Sample | $\tau_1$ (ns) (Rel. %) | $\tau_2$ (ns) (Rel. %) | $\tau_a$ |
|--------|------------------------|------------------------|----------|
| UCN    | 1.46(75.45)            | 18.91(24.54)           | 15.5     |
| HPCN   | 1.51 (56.32)           | 7.23 (43.68)           | 6.0      |

$\tau_a$  represents the average lifetime (ns) of photogenerated carriers ;  $\tau_1$ , and  $\tau_2$  represent the lifetime (ns) in the radiative and non-radiative energy transfer process, respectively;  $A_1$  and  $A_2$  are the pre-exponential factors of decay curves.

Their TRPL spectra can be fitted by the following double exponential decay equation<sup>1</sup>:

$$I_{(t)} = I_0 + A_1 \exp(-t/\tau_1) + A_2 \exp(-t/\tau_2)$$

The average lifetime ( $\tau_a$ ) can be calculated according to the following equation<sup>2</sup>:

$$\tau_a = (A_1 \tau_1^2 + A_2 \tau_2^2) / (A_1 \tau_1 + A_2 \tau_2)$$

## Reference

1. P. Xia, M. Antonietti, B. Zhu, T. Heil, J. Yu and S. Cao, *Adv. Funct. Mater.*, 2019, **29**, 1900093.
2. W.-T. Hsu, Y.-L. Chen, C.-H. Chen, P.-S. Liu, T.-H. Hou, L.-J. Li and W.-H. Chang, *Nature communications*, 2015, **6**, 8963.
